# Supplementary material for: Synthesis and photophysical properties of chlorins bearing 0-4 distinct meso-substituents
Source: Royal Society of Chemistry journal article supplement (doi:10.1039/c3pp50240f), 2013-09-20
Supplement: c3pp50240f.pdf [file c3pp50240f.pdf]

Supplementary Information for:

**Synthesis and photophysical properties of chlorins bearing 0–4 distinct meso-substituents**

Kunche Aravindu, Han-Je Kim, Masahiko Taniguchi, Preston L. Dilbeck, James R. Diers,  
David F. Bocian, Dewey Holten, and Jonathan S. Lindsey

**Table of Contents**

| Topic                                                  | Page  |
|--------------------------------------------------------|-------|
| 1. Synthesis of a second meso-substituted Western half | S1-S2 |
| 2. Experimental procedures                             | S2-S3 |

**1. Synthesis of a second meso-substituted Western half**

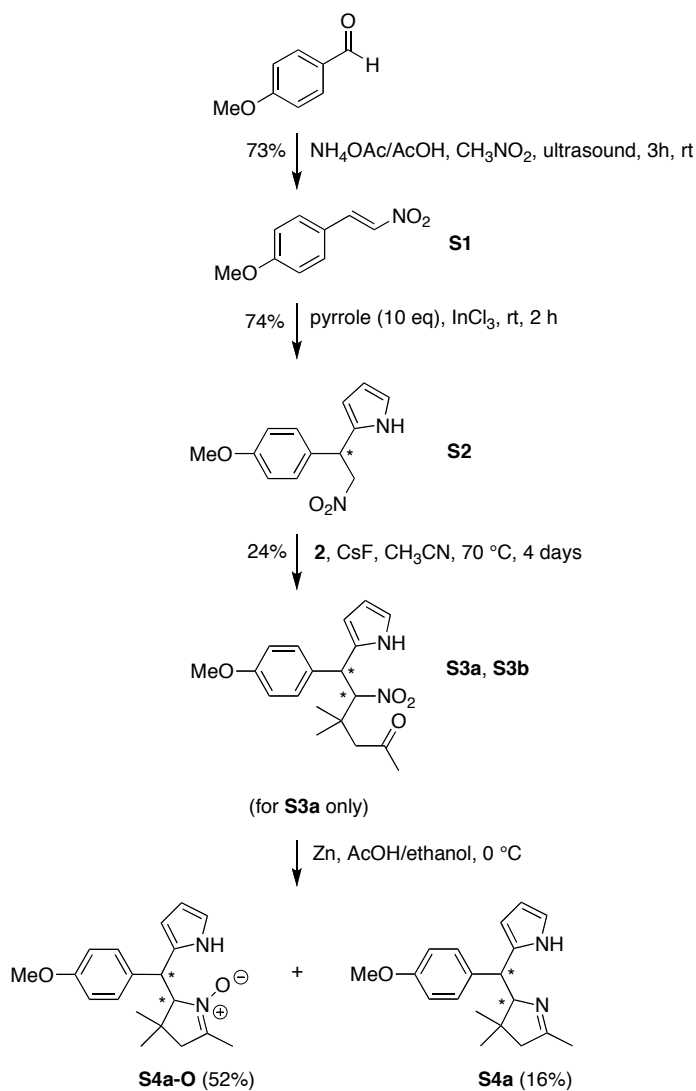

**Scheme S1.** Exploratory synthesis of a 5-aryltetrahydrodipyrin (Western half).

The Henry reaction of *p*-anisaldehyde and nitromethane under ultrasound conditions<sup>59</sup> afforded the nitrovinyl arene **S1** in 73% yield (Scheme S1). Compound **S1** has been reported

and characterized by mp only;<sup>50,61</sup> full characterization is presented here. The reaction of **S1** and pyrrole in dichloromethane containing InCl<sub>3</sub> at room temperature afforded 2-(2-nitro-1-(4-methoxyphenyl)ethyl)pyrrole **S2** in 74% yield. Compound **S2** was reported and fully characterized by Zhan *et al.* during the course of this work,<sup>60</sup> and has since been prepared by a number of other methods.<sup>52-56</sup> Treatment of **S2** with mesityl oxide (**2**) in the presence of CsF in anhydrous CH<sub>3</sub>CN at 70 °C provided the nitrohexanone adduct in 24% overall yield; two isomers were isolated in 22% (**S3a**) and 2% yield (**S3b**) without stereochemical identification. The reductive cyclization of **S3a** in the presence of excess zinc and acetic acid in ethanol at 0 °C gave *N*-oxide **S4a-O** (52% yield) and the corresponding Western half **S4a** (16% yield).

## 2. Experimental procedures

**1-Methoxy-4-(2-nitrovinyl)benzene (S1).** Following a literature procedure,<sup>59</sup> a mixture of *p*-anisaldehyde (2.43 mL, 20.0 mmol), nitromethane (13.0 mL, 241 mmol), glacial acetic acid (3.30 mL, 57.2 mmol) and ammonium acetate (3.32 g, 43.1 mmol) was sonicated at room temperature for 3 h, causing an increase in reaction temperature to ~55 °C. The nitromethane and glacial acetic acid were removed under reduced pressure. The residue was treated with water (30 mL) and extracted with CH<sub>2</sub>Cl<sub>2</sub>. The combined organic extract was evaporated under reduced pressure to leave ~10 mL of solvent, whereupon aqueous ethanol was added. The resulting yellow solid was filtered (2.61 g, 73%): mp 86–88 °C (lit mp 84–86 °C;<sup>50</sup> 86–87 °C<sup>61</sup>); <sup>1</sup>H NMR δ 3.88 (s, 3H), 6.96 (d, *J* = 9.0 Hz, 2H), 7.51 (d, *J* = 9.0 Hz, 2H), 7.53 (d, *J* = 13.6 Hz, 1H), 7.98 (d, *J* = 13.6 Hz, 1H); <sup>13</sup>C NMR δ 55.7, 115.1, 122.7, 131.4, 135.2, 139.3, 163.1; Anal. Calcd. for C<sub>9</sub>H<sub>9</sub>NO<sub>3</sub>: C, 60.33; H, 5.06; N, 7.82. Found C, 60.39; H, 5.04; N, 7.80.

**2-[(4-Methoxyphenyl)-2-nitroethyl]pyrrole (S2).** A stirred solution of **S1** (6.89 g, 38.5 mmol) in CH<sub>2</sub>Cl<sub>2</sub> (77.0 mL) containing InCl<sub>3</sub> (852 mg, 3.85 mmol) at 0 °C was treated with pyrrole (26.9 mL, 385 mmol). The mixture was stirred at room temperature for 2 h. After complete conversion as indicated by TLC, the reaction was quenched by the addition of water (80.0 mL). The mixture was extracted with CH<sub>2</sub>Cl<sub>2</sub> (3 x 70.0 mL). The combined organic extract was dried (Na<sub>2</sub>SO<sub>4</sub>) and concentrated under reduced pressure. The residue was purified by column chromatography (silica, CH<sub>2</sub>Cl<sub>2</sub>) to give a pale yellow oil (6.98 g, 74%): <sup>1</sup>H NMR δ 3.78 (s, 3H), 4.76 (ABX, <sup>3</sup>*J* = 8.0 Hz, <sup>2</sup>*J* = 12.0 Hz, 1H), 4.84 (ABX, <sup>3</sup>*J* = 6.8 Hz, <sup>3</sup>*J* = 8.0 Hz, 1H), 4.95 (ABX, <sup>3</sup>*J* = 6.8 Hz, <sup>2</sup>*J* = 12.0 Hz, 1H), 6.04–6.07 (m, 1H), 6.14–6.18 (m, 1H), 6.66–6.69 (m, 1H), 6.87 (d, *J* = 8.6 Hz, 2H), 7.14 (d, *J* = 8.6 Hz, 2H), 7.75–7.92 (br, 1H); <sup>13</sup>C NMR δ 42.4, 55.5, 79.6, 105.7, 108.8, 114.7, 118.3, 129.2, 129.5, 130.0, 159.5; FAB-MS obsd 246.1008, calcd 246.1004 (C<sub>13</sub>H<sub>14</sub>N<sub>2</sub>O<sub>3</sub>); Anal. Calcd. for C<sub>13</sub>H<sub>14</sub>N<sub>2</sub>O<sub>3</sub>: C, 63.40; H, 5.73; N, 11.38. Found C, 63.42; H, 5.70; N, 11.30.

**6-(4-Methoxyphenyl)-4,4-dimethyl-5-nitro-6-(2-pyrrolyl)-2-hexanone (S3a, S3b).** Cesium fluoride (731 mg, 4.81 mmol, freshly dried by heating to 100 °C under vacuum for 1 h and then cooling to room temperature under argon) was placed in a flask under argon. A mixture of **S2** (236 mg, 0.962 mmol) and mesityl oxide (**2**, 11.0 mL, 96.0 mmol) was transferred by cannula to the flask containing CsF. The mixture was heated and stirred at 70 °C for 4 days. The reaction mixture was filtered and the filtrate was concentrated under reduced pressure. TLC analysis [silica, ethyl acetate/hexanes (1:3)] showed two components with *R<sub>f</sub>* = 0.32 (**S3a**, major) and *R<sub>f</sub>* = 0.27 (**S3b**, minor). Column chromatography [silica, ethyl acetate/hexanes (1:3)] afforded each component as a light yellow oil (**S3a**, 72 mg, 22%; **S3b**, 6.1 mg, 2%); the two were found to be isomers.

Data for **S3a**:  $^1\text{H}$  NMR  $\delta$  1.12 (s, 3H), 1.17 (s, 3H), 1.72, 2.22 (AB,  $^2J = 18.4$  Hz, 2H), 1.98 (s, 3H), 3.72 (s, 3H), 4.67 (d,  $J = 12.2$  Hz, 1H), 6.04–6.07 (m, 1H), 6.10–6.12 (m, 1H), 6.21 (d,  $J = 12.2$  Hz, 1H), 6.59–6.62 (m, 1H), 6.79 (d,  $J = 8.8$  Hz, 2H), 7.29 (d,  $J = 8.8$  Hz, 2H), 8.31–8.39 (br, 1H);  $^{13}\text{C}$  NMR  $\delta$  23.0, 26.2, 31.8, 36.6, 44.9, 51.7, 55.4, 93.6, 107.7, 109.0, 114.5, 118.5, 128.4, 129.5, 132.0, 158.9, 209.2; FAB-MS obsd 344.1732, calcd 344.1736 ( $\text{C}_{19}\text{H}_{24}\text{N}_2\text{O}_4$ ).

Data for **S3b**:  $^1\text{H}$  NMR  $\delta$  1.03 (s, 3H), 1.05 (s, 3H), 1.94 (s, 3H), 2.05, 2.31 (AB,  $^2J = 18.8$  Hz, 2H), 3.77 (s, 3H), 4.61 (d,  $J = 10.2$  Hz, 1H), 5.93 (d,  $J = 10.2$  Hz, 1H), 6.07–6.11 (m, 2H), 6.64–6.66 (m, 1H), 6.83 (d,  $J = 8.8$  Hz, 2H), 7.21 (d,  $J = 8.8$  Hz, 2H), 8.28–8.40 (br, 1H);  $^{13}\text{C}$  NMR  $\delta$  24.3, 25.8, 31.4, 37.0, 44.9, 52.6, 55.5, 95.8, 107.3, 108.8, 114.6, 117.9, 129.4, 129.9, 131.3, 159.1, 207.1; FAB-MS obsd 345.1802, calcd 345.1814 [(M + H) $^+$ , M =  $\text{C}_{19}\text{H}_{24}\text{N}_2\text{O}_4$ ].

**5-(4-Methoxyphenyl)-2,3,4,5-tetrahydro-1,3,3-trimethyldipyrin  $N^{10}$ -oxide (S4a-O).** Following a literature procedure,<sup>32</sup> a vigorously stirred solution of **S3a** (64 mg, 0.19 mmol) in acetic acid (0.93 mL) and ethanol (0.93 mL) at 0 °C was treated portionwise with zinc dust (300 mg, 4.7 mmol) for 5 min. The reaction mixture was stirred at 0 °C for 15 min and then filtered through Celite. The filtrate was concentrated under high vacuum. The resulting oil was chromatographed (silica, ethyl acetate) to afford a pale yellow oil (**S4a**, 9 mg, 16%) and the title compound as a yellow oil (30 mg, 52%).

Data for **S4a-O**:  $^1\text{H}$  NMR  $\delta$  1.16 (s, 3H), 1.36 (s, 3H), 1.70–1.77 (m, 1H), 1.91 (s, 3H), 1.97–2.04 (m, 1H), 4.14–4.16 (m, 1H), 4.47–4.50 (m, 1H), 5.88–5.91 (m, 1H), 6.02–6.05 (m, 1H), 6.72–6.75 (m, 1H), 6.75 (d,  $J = 8.8$  Hz, 2H), 7.29 (d,  $J = 8.8$  Hz, 2H), 12.11–12.20 (br, 1H);  $^{13}\text{C}$  NMR  $\delta$  13.4, 23.0, 31.5, 37.6, 44.9, 46.4, 55.4, 85.6, 105.2, 107.6, 114.0, 117.4, 130.0, 131.8, 134.1, 149.7, 158.7; FAB-MS obsd 313.1916, calcd 313.1916 [(M + H) $^+$ , M =  $\text{C}_{19}\text{H}_{24}\text{N}_2\text{O}_2$ ].

Data for **S4a**:  $^1\text{H}$  NMR  $\delta$  0.97 (s, 3H), 1.05 (s, 3H), 1.60–1.72 (m, 1H), 2.01–2.02 (m, 3H), 2.06–2.08 (m, 1H), 3.74 (s, 3H), 4.17–4.21 (m, 1H), 4.20–4.23 (m, 1H), 5.93–5.96 (m, 1H), 6.05–6.08 (m, 1H), 6.65–6.68 (m, 1H), 6.73 (d,  $J = 8.6$  Hz, 2H), 7.21 (d,  $J = 8.6$  Hz, 2H), 9.59–9.66 (br, 1H); FAB-MS obsd 297.1971, calcd 297.1967 [(M + H) $^+$ , M =  $\text{C}_{19}\text{H}_{24}\text{N}_2\text{O}$ ].
